# Supplementary material for: New insights into O and OH adsorption on the Pt–Co alloy surface: effects of Pt/Co ratios and structures
Source: Royal Society of Chemistry journal article supplement (doi:10.1039/d0cp02746d), 2020-01-01
Supplement: d0cp02746d1.pdf [file d0cp02746d1.pdf]

# New insights into O and OH adsorption on Pt-Co alloy surface: Effects of Pt/Co ratios and structures

Peng Zhao, Xiaoqian Qin, Haibo Li, Konggang Qu and Rui Li\*

Department of Chemistry, Liaocheng University, Liaocheng 252000, China

\*Corresponding authors.

Rui Li, Tel: +86-635-8230633; E-mail: lirui@lcu.edu.cn

## Supplementary Information

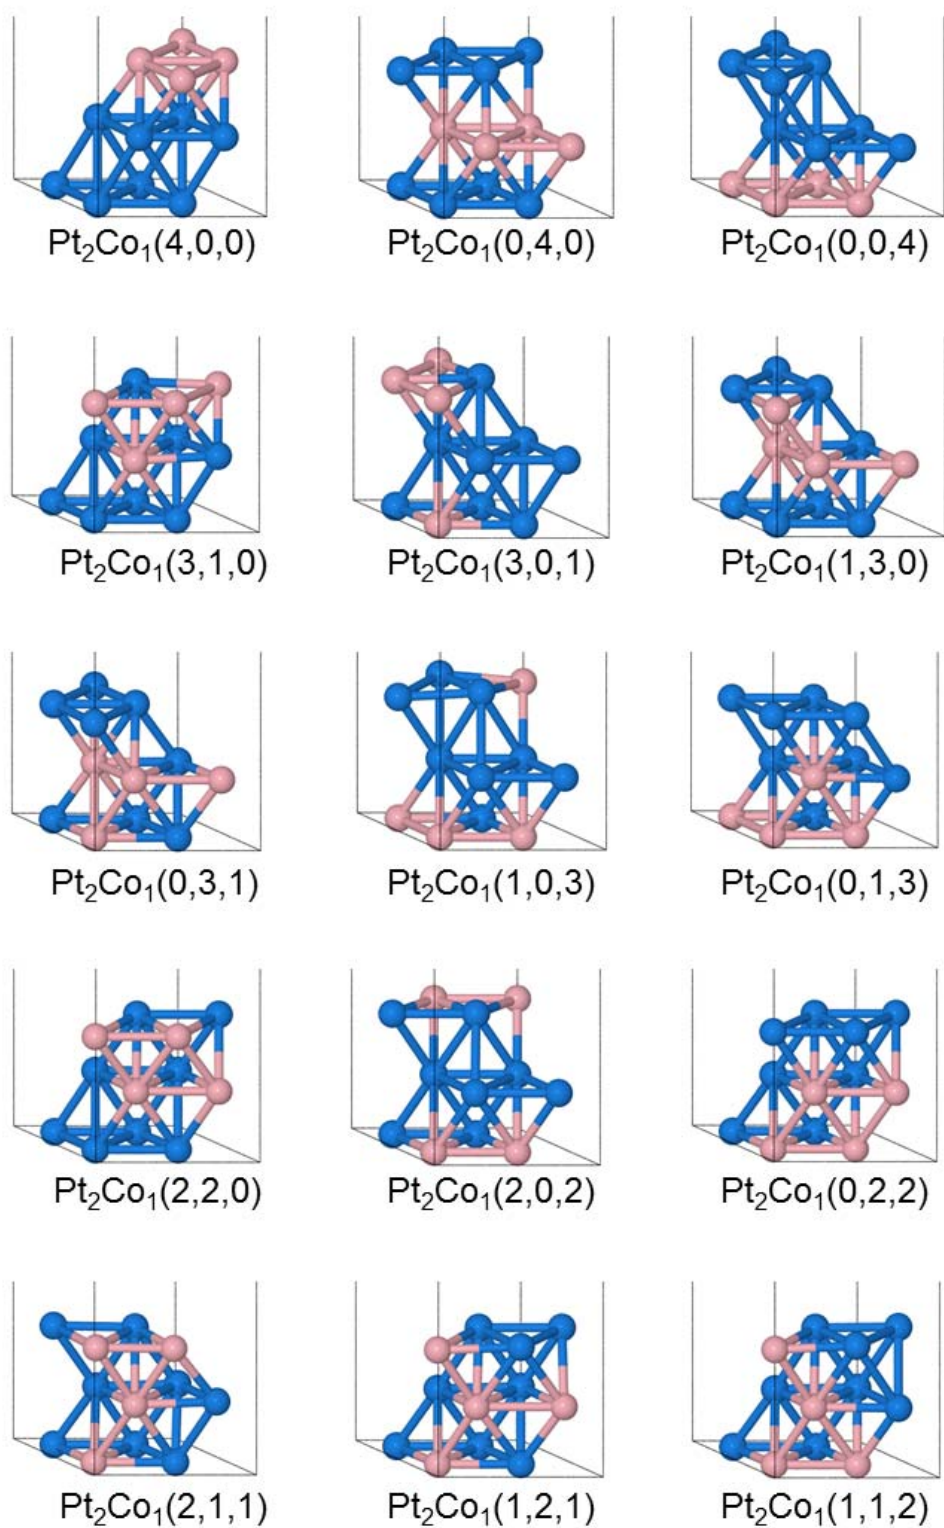

**Fig. S1** The alloy configurations with Pt/Co atomic ratio of 2:1. The colors of Pt and Co atoms are blue and pink, respectively.

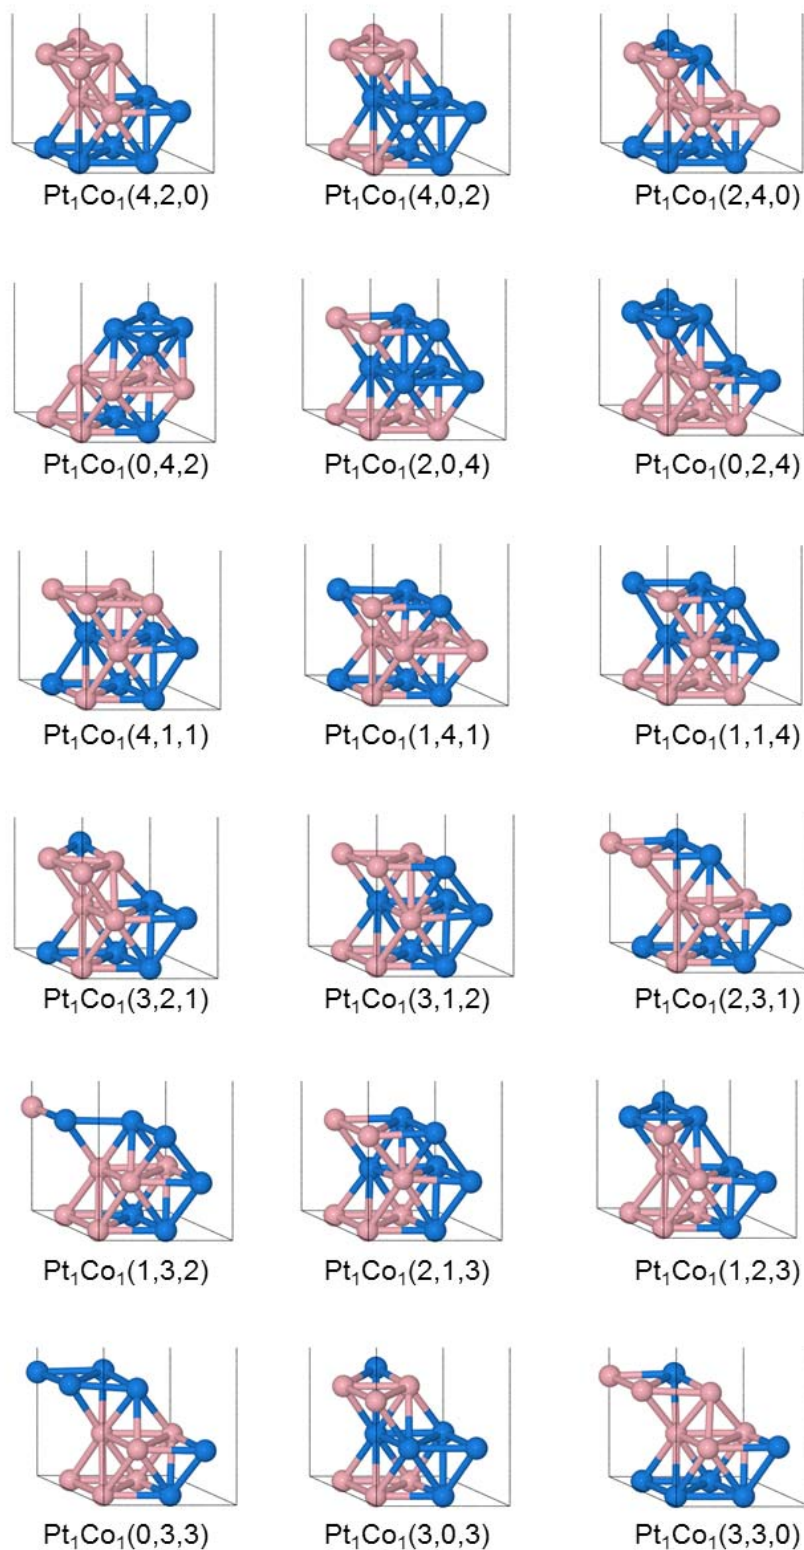

**Fig. S2** The alloy configurations with Pt/Co atomic ratio of 1:1. The colors of Pt and Co atoms are blue and pink, respectively.

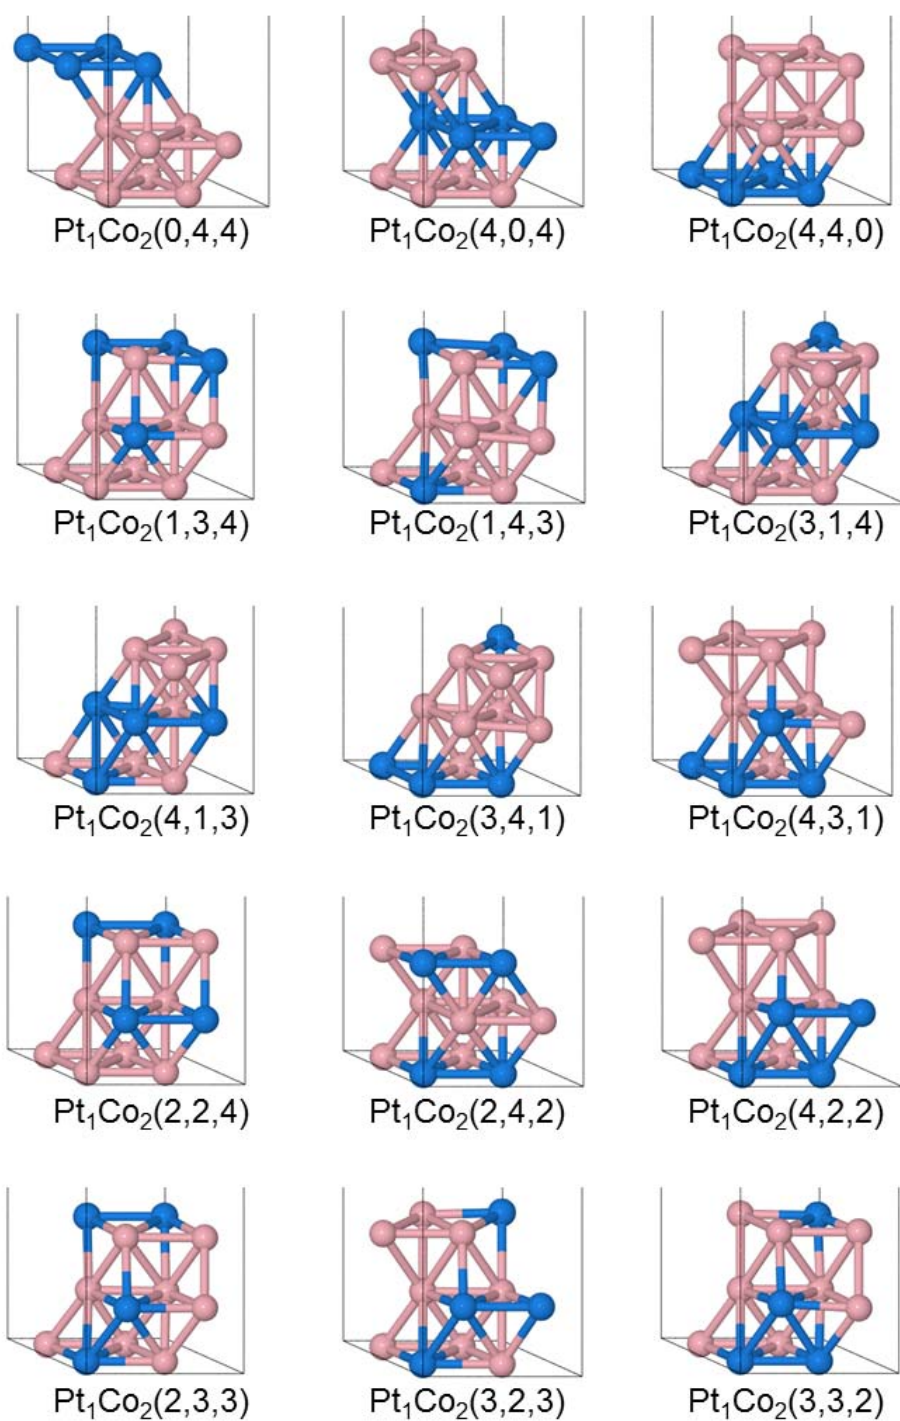

**Fig. S3** The alloy configurations with Pt/Co atomic ratio of 1:2. The colors of Pt and Co atoms are blue and pink, respectively.

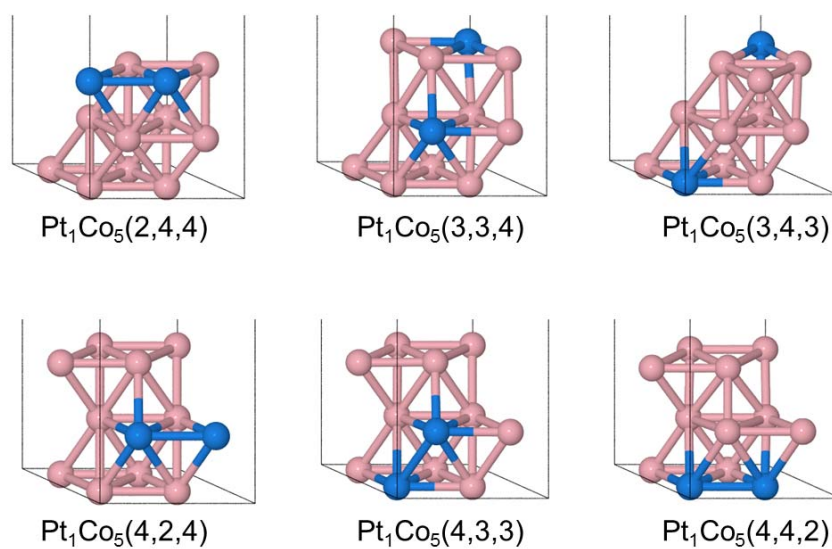

**Fig. S4** The alloy configurations with Pt/Co atomic ratio of 1:5. The colors of Pt and Co atoms are blue and pink, respectively.

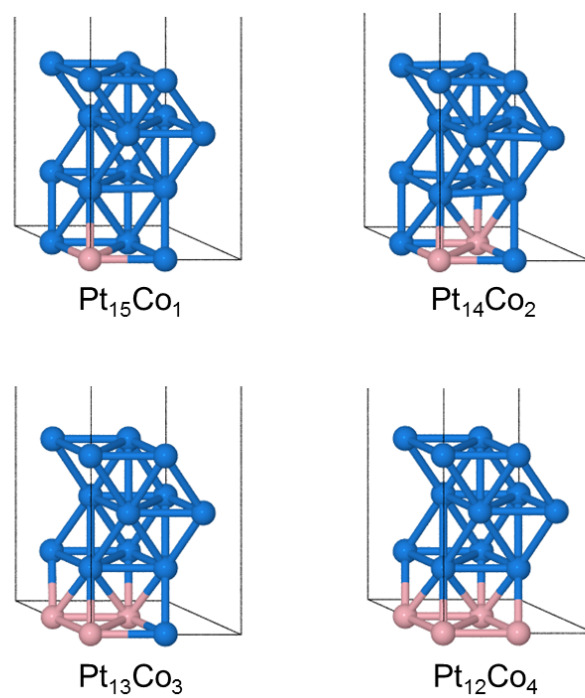

**Fig. S5** The alloy configurations with different Pt/Co atomic ratio in the fourth atomic layer. The colors of Pt and Co atoms are blue and pink, respectively.

Table S1. The number of charge transfer of Co atoms in different alloy compositions. Here, '+' represents the loss of electrons.  $\Delta Q_t$  represents the total value of charge transfers for all Co atoms in the corresponding structure, and  $\Delta Q_a$  represents the average value for per Co atom. All values shown in the table are the results of averaging all structures of the same composition.

| Pt/Co ratio | $\Delta Q_t$ | $\Delta Q_a$ |
|-------------|--------------|--------------|
| 5:1         | +1.09        | +0.55        |
| 2:1         | +1.73        | +0.43        |
| 1:1         | +2.10        | +0.35        |
| 1:2         | +1.66        | +0.21        |
| 1:5         | +1.22        | +0.12        |

Table S2. Adsorption energy ( $E_{\text{ads}}$ , in eV) of O and OH on Pt<sub>5</sub>Co<sub>1</sub> alloy surfaces with coverage of 1/4 and 1/16 ML

| Configuration                           | Coverage (in ML) | $E_{\text{ads}}(\text{O})$ | $E_{\text{ads}}(\text{OH})$ |
|-----------------------------------------|------------------|----------------------------|-----------------------------|
| Pt <sub>5</sub> Co <sub>1</sub> (0,2,0) | 1/4              | -3.86                      | -2.41                       |
|                                         | 1/16             | -3.84                      | -2.38                       |
| Pt <sub>5</sub> Co <sub>1</sub> (0,1,1) | 1/4              | -4.23                      | -2.27                       |
|                                         | 1/16             | -4.21                      | -2.25                       |
| Pt <sub>5</sub> Co <sub>1</sub> (0,0,2) | 1/4              | -4.60                      | -2.45                       |
|                                         | 1/16             | -4.58                      | -2.44                       |
| Pt <sub>5</sub> Co <sub>1</sub> (1,1,0) | 1/4              | -4.59                      | -3.06                       |
|                                         | 1/16             | -4.56                      | -3.05                       |
| Pt <sub>5</sub> Co <sub>1</sub> (1,0,1) | 1/4              | -4.75                      | -2.63                       |
|                                         | 1/16             | -4.71                      | -2.62                       |
| Pt <sub>5</sub> Co <sub>1</sub> (2,0,0) | 1/4              | -5.65                      | -2.83                       |
|                                         | 1/16             | -5.62                      | -2.81                       |



Table S3. Adsorption energy ( $E_{\text{ads}}$ , in eV) of O and OH on selected Pt-Co alloy surfaces. The corresponding configurations are displayed in Fig. S5.

| Configuration                    | $E_{\text{ads}}(\text{O})$ | $E_{\text{ads}}(\text{OH})$ |
|----------------------------------|----------------------------|-----------------------------|
| Pt <sub>15</sub> Co <sub>1</sub> | -4.65                      | -2.46                       |
| Pt <sub>14</sub> Co <sub>2</sub> | -4.63                      | -2.46                       |
| Pt <sub>13</sub> Co <sub>3</sub> | -4.65                      | -2.48                       |
| Pt <sub>12</sub> Co <sub>4</sub> | -4.68                      | -2.47                       |
